# Supplementary material
Source: ML conference proceedings conference paper supplement (https://openaccess.thecvf.com/content/CVPR2024/html/Shi_ZeroRF_Fast_Sparse_CVPR_2024_paper.html)
Supplement: Supplementary file 1 [file Shi_ZeroRF_Fast_Sparse_CVPR_2024_supplemental.pdf]

## A. More Results on NeRF-Synthetic and OpenIllumination

Here we show more complete results including metrics and visualization views on all scenes in NeRF-Synthetic and OpenIllumination. See Tab. 5, 6, 7, 8 and Fig. 13, 14.

## B. Comparisons on DTU

We include DTU for the sake of completeness though it is a forward-facing dataset and falls outside our focus of interest. There are different considerations in sparse view reconstruction for forward-facing and 360 – for forward-facing scenes and objects, as the back side is undefined, the features are also largely undefined. In this case, ZeroRF still performs better than or on-par with the state-of-the-art methods (Tab. 9), but does not show a significant margin.

## C. Architecture Implementation

The SD Decoder generator (final generator for ZeroRF) architecture consists of ResNet convolutional blocks and upsampling modules. More hyperparameters are listed in Tab. 10. The input noise resolutions for NeRF-Synthetic, OpenIllumination and DTU are 20 while it is 7 for generation and editing tasks. It is about 1/40 of the image resolution. The network has only 7M parameters, and the computation is negligible compared to per-point decoding and ray integral. The decoder architecture is illustrated in Fig. 11, which is a direct implementation of Eq. (5, 6) in the main paper.

## D. Grid Resolution Influence

We experiment on the NeRF-Synthetic 6-view setting at various resolutions and find that resolution has little effect on model performance, as shown in Tab. 11. Comparing resolutions of 160, 240, 320, and 400, we observe that the PSNR varies by less than 0.15 dB.

## E. Limitations and Future Work

We discuss more about the limitations and future work of ZeroRF in this section. We found in our experiments that ZeroRF has a chance to magnify the weakness in the underlying representations. For example, it is known that TensorRF exhibits axis-aligned artifacts under  $SO(3)$  rotations [19]. Under certain circumstances, ZeroRF (on TensorRF) will bias towards axis-aligned geometries (see the edges of the hat in Fig. 5 of main paper, as well as the pumpkins in Fig. 14). Applying ZeroRF to DiF does not have this issue, but minor floaters in unseen areas may occur.

Another future work for ZeroRF, as mentioned in the main paper, is to apply it for unbounded scenes. Grid representations usually perform a non-linear contraction in

space to represent unbounded scenes, which leads to features being distorted, especially for the background areas. The features are thus hardly perceivable as a natural image, as shown in Fig. 12. Consequently, extra work would be needed to apply our technique to unbounded scenes.

Table 5. Comparison of per-scene metrics of NeRF-Synthetic 6 view settings.

|          |       | chair | drums | ficus | hotdog | lego  | materials | mic   | ship  | mean  |
|----------|-------|-------|-------|-------|--------|-------|-----------|-------|-------|-------|
| RegNeRF  | PSNR  | 13.16 | 9.44  | 12.34 | 9.61   | 9.07  | 7.40      | 11.28 | 6.19  | 9.81  |
|          | SSIM  | 0.580 | 0.280 | 0.512 | 0.470  | 0.413 | 0.258     | 0.463 | 0.285 | 0.407 |
|          | LPIPS | 0.510 | 0.609 | 0.543 | 0.569  | 0.600 | 0.634     | 0.523 | 0.651 | 0.580 |
| FlipNeRF | PSNR  | 25.31 | 18.66 | 19.81 | 27.73  | 21.29 | 20.79     | 20.38 | 19.84 | 21.73 |
|          | SSIM  | 0.887 | 0.815 | 0.844 | 0.925  | 0.820 | 0.839     | 0.887 | 0.746 | 0.845 |
|          | LPIPS | 0.080 | 0.239 | 0.144 | 0.173  | 0.207 | 0.242     | 0.172 | 0.361 | 0.202 |
| DietNeRF | PSNR  | 25.21 | 19.81 | 20.18 | 9.37   | 20.31 | 7.78      | 25.85 | 6.79  | 16.91 |
|          | SSIM  | 0.887 | 0.838 | 0.852 | 0.644  | 0.805 | 0.447     | 0.941 | 0.405 | 0.727 |
|          | LPIPS | 0.112 | 0.133 | 0.127 | 0.442  | 0.174 | 0.493     | 0.072 | 0.582 | 0.267 |
| InfoNeRF | PSNR  | 24.87 | 18.39 | 20.59 | 23.61  | 21.92 | 20.42     | 20.84 | 20.86 | 21.44 |
|          | SSIM  | 0.892 | 0.824 | 0.859 | 0.903  | 0.854 | 0.838     | 0.904 | 0.758 | 0.854 |
|          | LPIPS | 0.111 | 0.190 | 0.138 | 0.133  | 0.150 | 0.159     | 0.119 | 0.274 | 0.159 |
| FreeNeRF | PSNR  | 26.57 | 18.16 | 18.46 | 27.18  | 24.32 | 21.63     | 25.64 | 20.23 | 22.77 |
|          | SSIM  | 0.916 | 0.827 | 0.840 | 0.929  | 0.887 | 0.853     | 0.942 | 0.729 | 0.865 |
|          | LPIPS | 0.071 | 0.176 | 0.161 | 0.096  | 0.132 | 0.202     | 0.066 | 0.290 | 0.149 |
| Ours     | PSNR  | 27.62 | 20.88 | 22.21 | 29.93  | 26.26 | 21.41     | 27.40 | 22.13 | 24.73 |
|          | SSIM  | 0.926 | 0.869 | 0.898 | 0.949  | 0.913 | 0.849     | 0.954 | 0.756 | 0.889 |
|          | LPIPS | 0.074 | 0.131 | 0.100 | 0.075  | 0.085 | 0.132     | 0.050 | 0.256 | 0.113 |

Table 6. Comparison of per-scene metrics of NeRF-Synthetic 4 view settings.

|          |       | chair | drums | ficus | hotdog | lego  | materials | mic   | ship  | mean  |
|----------|-------|-------|-------|-------|--------|-------|-----------|-------|-------|-------|
| RegNeRF  | PSNR  | 13.12 | 9.75  | 11.78 | 9.16   | 8.64  | 7.91      | 13.10 | 5.98  | 9.93  |
|          | SSIM  | 0.581 | 0.304 | 0.422 | 0.475  | 0.364 | 0.254     | 0.696 | 0.258 | 0.419 |
|          | LPIPS | 0.507 | 0.615 | 0.594 | 0.565  | 0.639 | 0.621     | 0.353 | 0.683 | 0.572 |
| FlipNeRF | PSNR  | 19.89 | 16.53 | 18.76 | 26.26  | 19.96 | 20.71     | 17.99 | 18.15 | 19.78 |
|          | SSIM  | 0.828 | 0.771 | 0.836 | 0.918  | 0.801 | 0.844     | 0.858 | 0.715 | 0.822 |
|          | LPIPS | 0.130 | 0.281 | 0.151 | 0.170  | 0.209 | 0.200     | 0.182 | 0.374 | 0.212 |
| DietNeRF | PSNR  | 17.47 | 12.96 | 9.50  | 12.33  | 7.87  | 6.19      | 14.81 | 6.21  | 10.92 |
|          | SSIM  | 0.775 | 0.650 | 0.451 | 0.658  | 0.397 | 0.363     | 0.773 | 0.389 | 0.557 |
|          | LPIPS | 0.264 | 0.333 | 0.518 | 0.418  | 0.587 | 0.545     | 0.286 | 0.616 | 0.446 |
| InfoNeRF | PSNR  | 20.02 | 12.13 | 19.47 | 18.92  | 17.77 | 20.38     | 15.79 | 18.18 | 17.83 |
|          | SSIM  | 0.841 | 0.686 | 0.849 | 0.864  | 0.770 | 0.850     | 0.845 | 0.713 | 0.802 |
|          | LPIPS | 0.164 | 0.344 | 0.153 | 0.179  | 0.221 | 0.142     | 0.184 | 0.310 | 0.212 |
| FreeNeRF | PSNR  | 20.22 | 14.99 | 17.35 | 23.58  | 20.43 | 21.36     | 15.05 | 17.52 | 18.81 |
|          | SSIM  | 0.843 | 0.746 | 0.809 | 0.899  | 0.818 | 0.857     | 0.802 | 0.687 | 0.808 |
|          | LPIPS | 0.109 | 0.280 | 0.144 | 0.108  | 0.156 | 0.174     | 0.218 | 0.318 | 0.188 |
| Ours     | PSNR  | 23.04 | 16.91 | 20.12 | 29.11  | 22.11 | 20.50     | 24.76 | 19.01 | 21.94 |
|          | SSIM  | 0.880 | 0.791 | 0.866 | 0.944  | 0.868 | 0.848     | 0.944 | 0.707 | 0.856 |
|          | LPIPS | 0.107 | 0.206 | 0.120 | 0.088  | 0.122 | 0.129     | 0.056 | 0.283 | 0.139 |

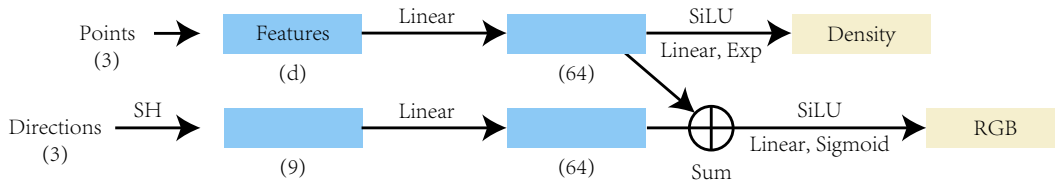

Figure 11. Decoder architecture.

Table 7. Comparison of per-scene metrics of OpenIllumination 6 view settings. We employ early-stopping by error on a validation view.

|          |       | stone | pumpkin | toy   | potato | pine  | shroom | cow   | cake  | mean  |
|----------|-------|-------|---------|-------|--------|-------|--------|-------|-------|-------|
| RegNeRF  | PSNR  | 13.80 | 13.58   | 13.54 | 13.92  | 11.87 | 13.22  | 13.07 | 19.66 | 14.08 |
|          | SSIM  | 0.848 | 0.848   | 0.884 | 0.854  | 0.807 | 0.863  | 0.807 | 0.958 | 0.859 |
|          | LPIPS | 0.288 | 0.350   | 0.237 | 0.348  | 0.337 | 0.329  | 0.405 | 0.128 | 0.303 |
| DietNeRF | PSNR  | 24.87 | 24.80   | 25.37 | 25.63  | 18.16 | 23.71  | 21.50 | 29.58 | 24.20 |
|          | SSIM  | 0.921 | 0.966   | 0.944 | 0.955  | 0.902 | 0.930  | 0.930 | 0.973 | 0.940 |
|          | LPIPS | 0.085 | 0.073   | 0.086 | 0.087  | 0.119 | 0.119  | 0.133 | 0.059 | 0.095 |
| InfoNeRF | PSNR  | 14.37 | 26.02   | 25.91 | 25.55  | 21.71 | 22.99  | 22.04 | 19.60 | 22.27 |
|          | SSIM  | 0.910 | 0.960   | 0.952 | 0.946  | 0.917 | 0.914  | 0.915 | 0.962 | 0.935 |
|          | LPIPS | 0.106 | 0.057   | 0.058 | 0.078  | 0.086 | 0.116  | 0.126 | 0.094 | 0.090 |
| FreeNeRF | PSNR  | 11.62 | 11.71   | 10.65 | 11.35  | 8.85  | 10.12  | 11.09 | 16.33 | 11.46 |
|          | SSIM  | 0.791 | 0.864   | 0.814 | 0.832  | 0.753 | 0.764  | 0.784 | 0.900 | 0.813 |
|          | LPIPS | 0.236 | 0.293   | 0.346 | 0.397  | 0.328 | 0.505  | 0.442 | 0.265 | 0.351 |
| Ours     | PSNR  | 26.30 | 27.87   | 27.28 | 27.26  | 22.26 | 26.34  | 23.74 | 31.00 | 26.49 |
|          | SSIM  | 0.929 | 0.966   | 0.950 | 0.951  | 0.918 | 0.928  | 0.921 | 0.969 | 0.941 |
|          | LPIPS | 0.063 | 0.064   | 0.062 | 0.084  | 0.088 | 0.106  | 0.118 | 0.052 | 0.080 |

Table 8. Comparison of per-scene metrics of OpenIllumination 4 view settings. We employ early-stopping by error on a validation view.

|          |       | stone | pumpkin | toy   | potato | pine  | shroom | cow   | cake  | mean  |
|----------|-------|-------|---------|-------|--------|-------|--------|-------|-------|-------|
| RegNeRF  | PSNR  | 10.26 | 11.74   | 10.04 | 11.63  | 9.37  | 10.66  | 11.99 | 17.21 | 11.62 |
|          | SSIM  | 0.602 | 0.749   | 0.637 | 0.719  | 0.571 | 0.658  | 0.748 | 0.868 | 0.694 |
|          | LPIPS | 0.483 | 0.465   | 0.476 | 0.505  | 0.486 | 0.551  | 0.460 | 0.359 | 0.473 |
| DietNeRF | PSNR  | 24.05 | 26.54   | 24.98 | 23.00  | 20.94 | 19.91  | 16.30 | 28.97 | 23.09 |
|          | SSIM  | 0.921 | 0.970   | 0.949 | 0.949  | 0.924 | 0.911  | 0.894 | 0.971 | 0.936 |
|          | LPIPS | 0.085 | 0.060   | 0.079 | 0.103  | 0.093 | 0.166  | 0.207 | 0.060 | 0.107 |
| InfoNeRF | PSNR  | 24.29 | 26.11   | 23.84 | 22.89  | 20.06 | 18.33  | 13.63 | 19.60 | 21.09 |
|          | SSIM  | 0.923 | 0.961   | 0.944 | 0.937  | 0.897 | 0.877  | 0.905 | 0.962 | 0.926 |
|          | LPIPS | 0.069 | 0.059   | 0.073 | 0.092  | 0.117 | 0.161  | 0.181 | 0.094 | 0.106 |
| FreeNeRF | PSNR  | 12.91 | 11.54   | 10.79 | 11.70  | 10.17 | 11.46  | 11.18 | 17.95 | 12.21 |
|          | SSIM  | 0.779 | 0.827   | 0.786 | 0.796  | 0.791 | 0.751  | 0.746 | 0.899 | 0.797 |
|          | LPIPS | 0.210 | 0.312   | 0.351 | 0.461  | 0.220 | 0.554  | 0.458 | 0.299 | 0.358 |
| Ours     | PSNR  | 25.07 | 26.07   | 23.72 | 26.27  | 20.68 | 23.14  | 21.91 | 29.44 | 24.42 |
|          | SSIM  | 0.918 | 0.961   | 0.936 | 0.946  | 0.903 | 0.912  | 0.905 | 0.965 | 0.930 |
|          | LPIPS | 0.072 | 0.075   | 0.089 | 0.096  | 0.116 | 0.134  | 0.139 | 0.058 | 0.098 |

Table 9. Comparison of per-scene metrics of DTU 3 view settings.

|          |       | Scan  | 24    | 37    | 40    | 55    | 63    | 65    | 69    | 83    | 97    | 105   | 106   | 110   | 114   | 118   | 122   | mean |
|----------|-------|-------|-------|-------|-------|-------|-------|-------|-------|-------|-------|-------|-------|-------|-------|-------|-------|------|
| DietNeRF | PSNR  | 10.37 | 13.06 | 12.69 | 12.92 | 20.24 | 17.99 | 17.91 | 18.85 | 13.47 | 14.83 | 19.52 | 18.04 | 18.09 | 22.98 | 23.65 | 16.97 |      |
|          | SSIM  | 0.245 | 0.525 | 0.296 | 0.322 | 0.810 | 0.801 | 0.433 | 0.702 | 0.333 | 0.417 | 0.693 | 0.520 | 0.630 | 0.771 | 0.786 | 0.552 |      |
|          | LPIPS | 0.615 | 0.372 | 0.541 | 0.411 | 0.219 | 0.198 | 0.413 | 0.214 | 0.432 | 0.383 | 0.313 | 0.320 | 0.301 | 0.228 | 0.199 | 0.344 |      |
| InfoNeRF | PSNR  | 10.32 | 8.34  | 9.25  | 14.86 | 5.08  | 12.30 | 12.32 | 9.01  | 9.11  | 9.49  | 15.64 | 14.58 | 16.80 | 16.44 | 17.72 | 12.09 |      |
|          | SSIM  | 0.446 | 0.342 | 0.407 | 0.384 | 0.300 | 0.399 | 0.109 | 0.417 | 0.303 | 0.322 | 0.359 | 0.186 | 0.495 | 0.407 | 0.497 | 0.358 |      |
|          | LPIPS | 0.564 | 0.505 | 0.556 | 0.567 | 0.605 | 0.549 | 0.561 | 0.571 | 0.569 | 0.568 | 0.481 | 0.495 | 0.451 | 0.460 | 0.451 | 0.530 |      |
| FlipNeRF | PSNR  | 10.81 | 17.41 | 11.93 | 16.72 | 22.02 | 20.37 | 17.02 | 28.11 | 18.60 | 22.13 | 21.65 | 20.44 | 21.53 | 23.56 | 26.16 | 19.90 |      |
|          | SSIM  | 0.475 | 0.700 | 0.523 | 0.686 | 0.880 | 0.865 | 0.640 | 0.943 | 0.775 | 0.843 | 0.800 | 0.819 | 0.795 | 0.828 | 0.869 | 0.763 |      |
|          | LPIPS | 0.462 | 0.186 | 0.452 | 0.268 | 0.174 | 0.160 | 0.332 | 0.104 | 0.257 | 0.196 | 0.294 | 0.209 | 0.267 | 0.267 | 0.181 | 0.254 |      |
| SPARF    | PSNR  | 16.80 | 14.55 | 17.05 | 20.75 | 16.02 | 18.82 | 19.12 | 12.17 | 16.66 | 15.83 | 23.16 | 19.45 | 23.69 | 24.10 | 21.50 | 18.64 |      |
|          | SSIM  | 0.679 | 0.633 | 0.688 | 0.705 | 0.767 | 0.727 | 0.622 | 0.617 | 0.663 | 0.713 | 0.767 | 0.687 | 0.794 | 0.799 | 0.701 | 0.704 |      |
|          | LPIPS | 0.440 | 0.373 | 0.341 | 0.305 | 0.238 | 0.356 | 0.372 | 0.503 | 0.437 | 0.239 | 0.412 | 0.373 | 0.359 | 0.373 | 0.363 | 0.366 |      |
| Ours     | PSNR  | 14.43 | 15.46 | 17.66 | 19.06 | 21.19 | 17.26 | 16.25 | 23.65 | 20.14 | 20.08 | 18.07 | 20.43 | 19.69 | 21.14 | 23.72 | 19.21 |      |
|          | SSIM  | 0.532 | 0.677 | 0.590 | 0.731 | 0.882 | 0.822 | 0.730 | 0.922 | 0.784 | 0.835 | 0.767 | 0.857 | 0.762 | 0.812 | 0.884 | 0.772 |      |
|          | LPIPS | 0.370 | 0.188 | 0.399 | 0.239 | 0.135 | 0.217 | 0.309 | 0.118 | 0.209 | 0.201 | 0.307 | 0.202 | 0.251 | 0.246 | 0.160 | 0.237 |      |

Table 10. Generator architecture listing.

| Item                          | Configuration            |
|-------------------------------|--------------------------|
| Input noise channels          | 8                        |
| Output feature channels       | 16                       |
| Block resolutions             | 1×, 2×, 4×, 8×, 16×, 16× |
| ResNet basic blocks per block | 2, 4, 4, 4, 4, 4         |
| # Parameters                  | 7.0 M                    |

Table 11. Influence of grid resolution to the model performance on NeRF-Synthetic dataset.

| Resolution | 400   | 320   | 240   | 160   |
|------------|-------|-------|-------|-------|
| PSNR       | 24.85 | 24.73 | 24.87 | 24.74 |
| SSIM       | 0.891 | 0.889 | 0.891 | 0.887 |
| LPIPS      | 0.117 | 0.113 | 0.119 | 0.124 |

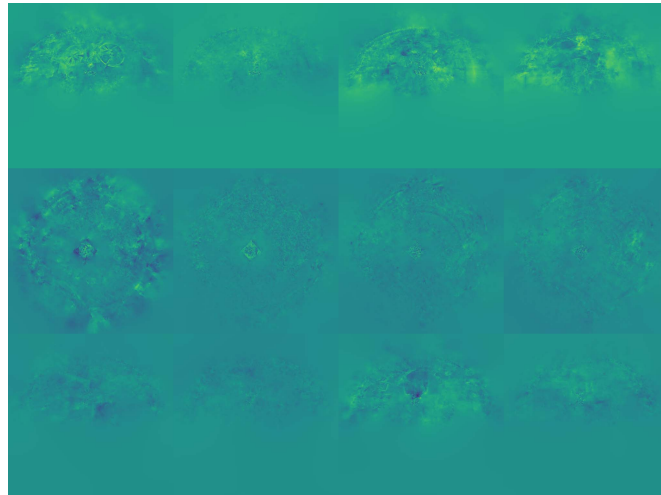

Figure 12. Visualization of features from dense-view TensoRF on the Bonsai scene from the mip-NeRF 360 dataset.

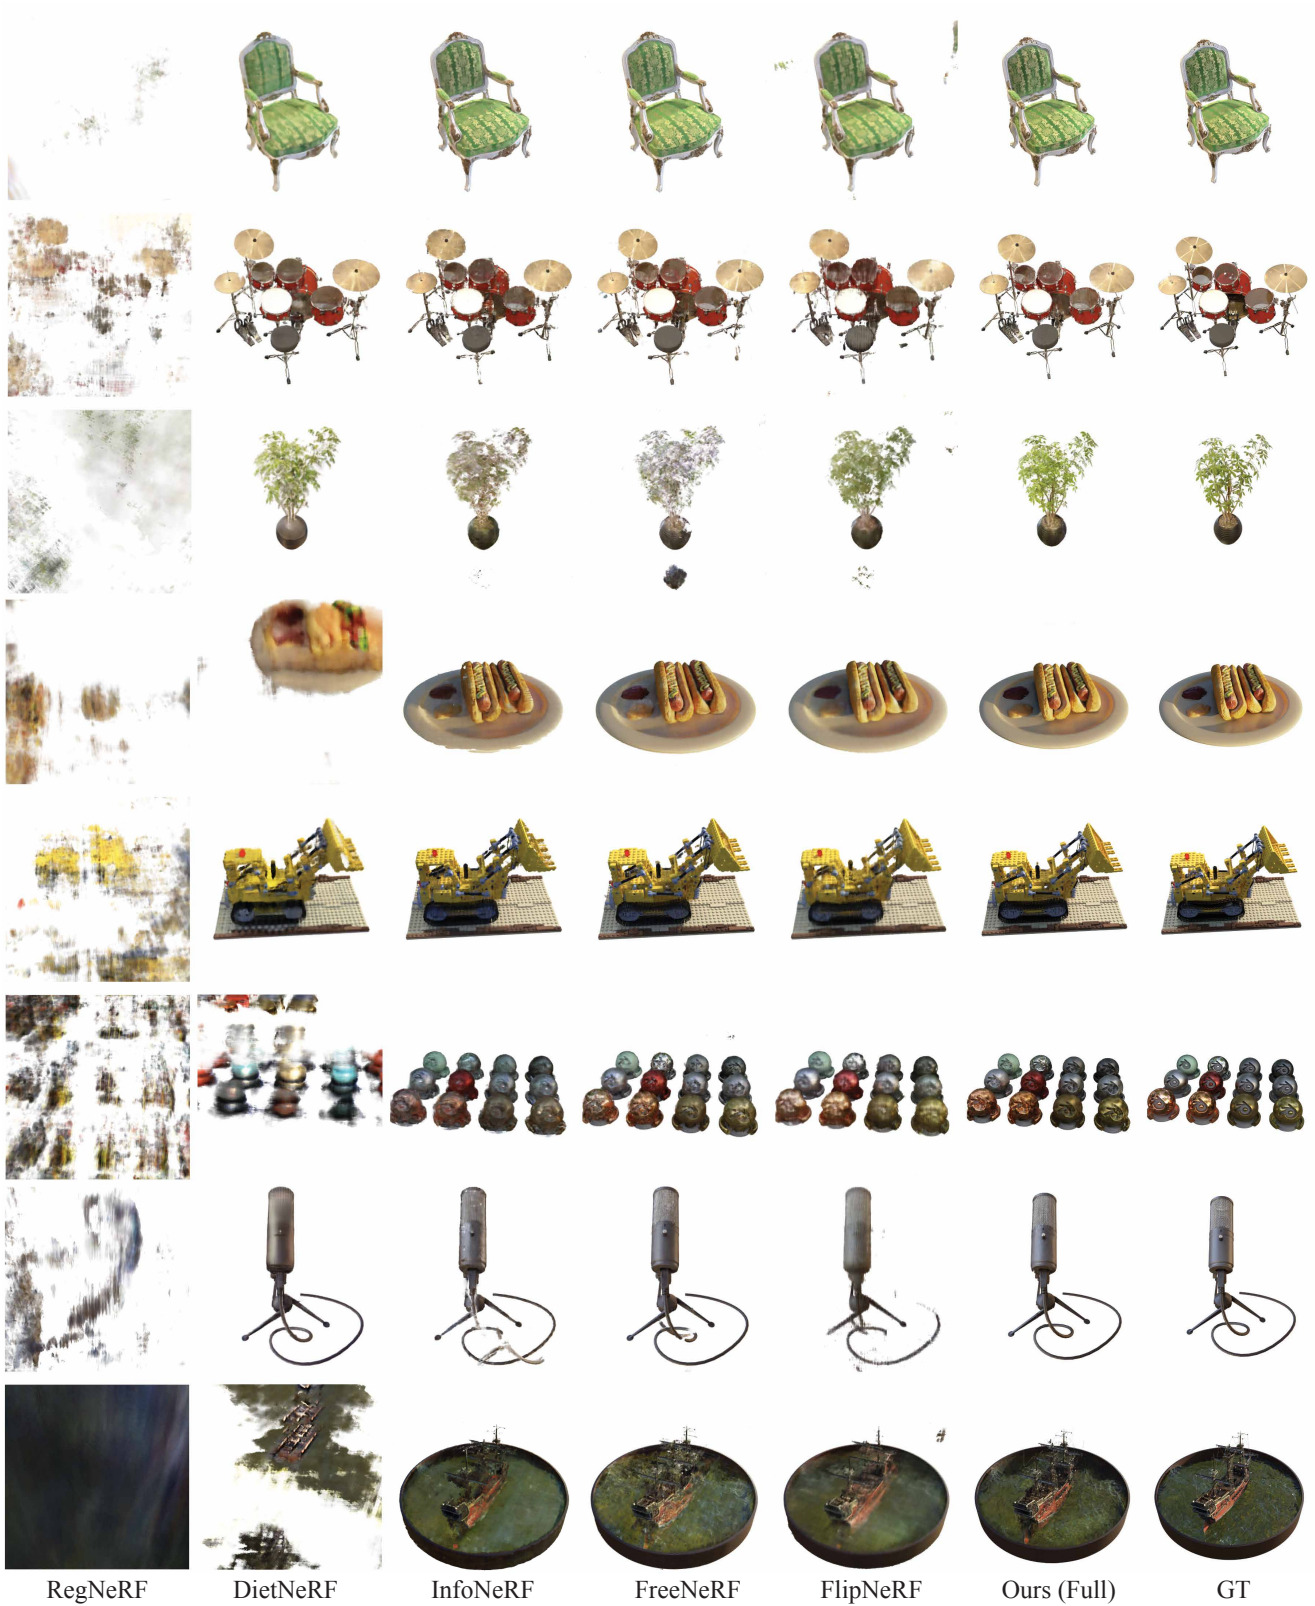

Figure 13. Per-scene qualitative comparisons of NeRF-Synthetic 6 view settings.

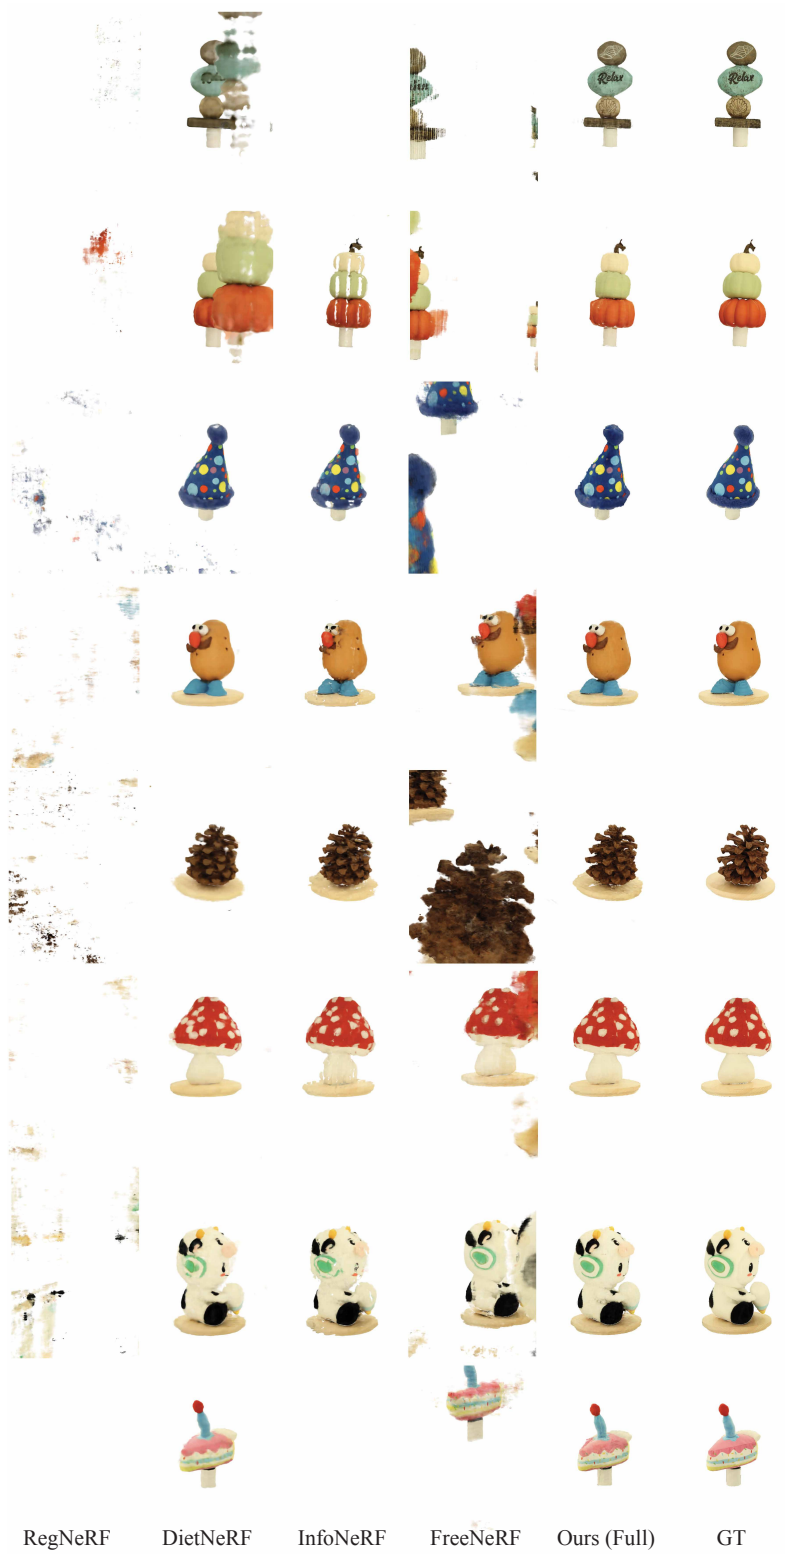

Figure 14. Per-scene qualitative comparisons of OpenIllumination 6 view settings.
